# Supplementary material for: Modulation effects of S vacancy and Mo edge on the adsorption and dissociation behaviors of toxic gas (H2S, SO2) molecules on the MoS2 monolayer
Source: Royal Society of Chemistry journal article supplement (doi:10.1039/d1cp01242h), 2021-01-01
Supplement: d1cp01242h1.pdf [file d1cp01242h1.pdf]

## Supplementary Information for

### Modulation effect of S vacancy and Mo edge on the adsorption and dissociation behaviors of toxic gas (H<sub>2</sub>S, SO<sub>2</sub>) molecules on MoS<sub>2</sub> monolayer

Min Huang<sup>1†\*</sup>, Acharya Dinesh<sup>2,3†</sup>, Songtao Wu<sup>4</sup>

*<sup>1</sup>Key Laboratory of Ferro and Piezoelectric Materials and Devices of Hubei Province, Faculty of Physics and Electronic Sciences, Hubei University, Wuhan 430062, P. R. China*

*<sup>2</sup>State Key Laboratory of Magnetic Resonance and Atomic and Molecular Physics, National Center for Magnetic Resonance in Wuhan, Key Laboratory of Magnetic Resonance in Biological Systems, Wuhan Institute of Physics and Mathematics, Innovation Academy for Measurement Science and Technology, Chinese Academy of Sciences, Wuhan 430071, P. R.*

*China.*

*<sup>3</sup>University of Chinese Academy of Sciences, Beijing 100049, P. R. China*

*<sup>4</sup>Wuhan Hanneng Power Development Co., Ltd. Wuhan 430056, P. R. China*

†These authors contribute equally to this work.

\*Corresponding author, Electronic address: [huangmin@hubu.edu.cn](mailto:huangmin@hubu.edu.cn)

**Figure S1.** Spin-polarized band structures for (a) H<sub>2</sub>S, (b) tilted structure, and (c) end-on structure of SO<sub>2</sub> adsorbed on MoS<sub>2</sub> with SV and (d) H<sub>2</sub>S, (e) tilted structure, and (f) end-on structure of SO<sub>2</sub> adsorbed on Mo edge.

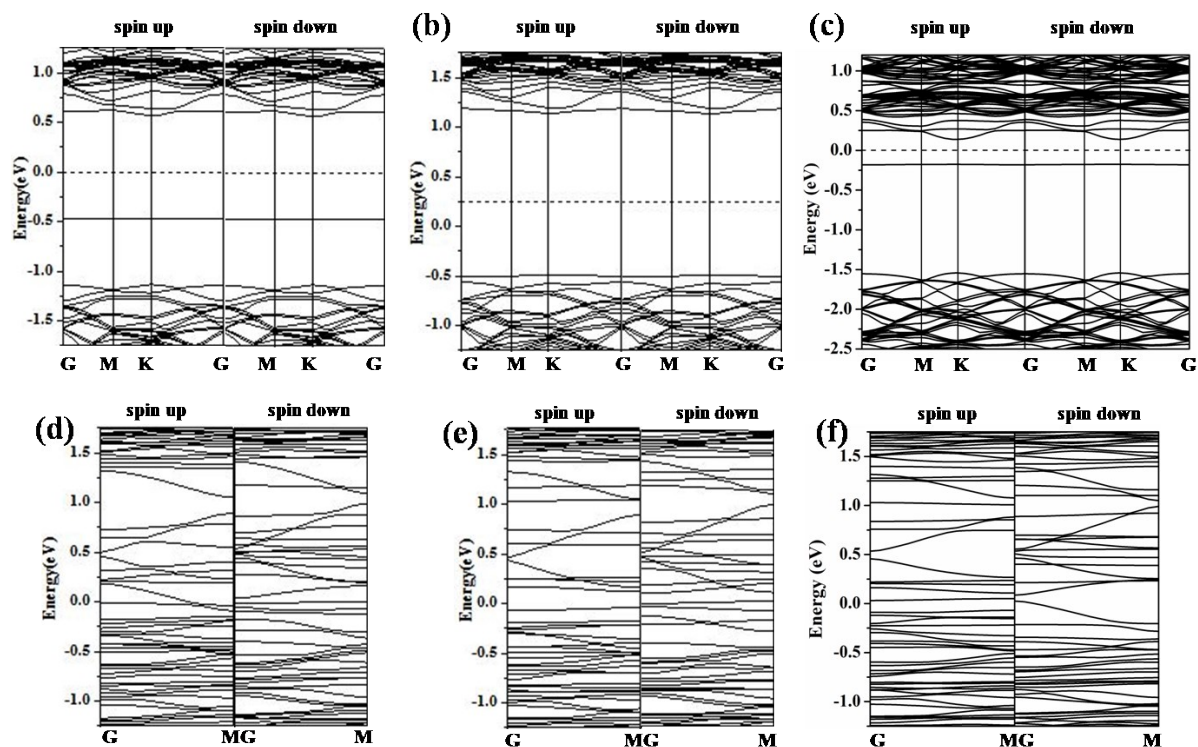

**Figure S2.** Calculated spin-polarized band structure and total density of states (TDOS) for the dissociated configuration of H<sub>2</sub>S on MoS<sub>2</sub> with S vacancy.

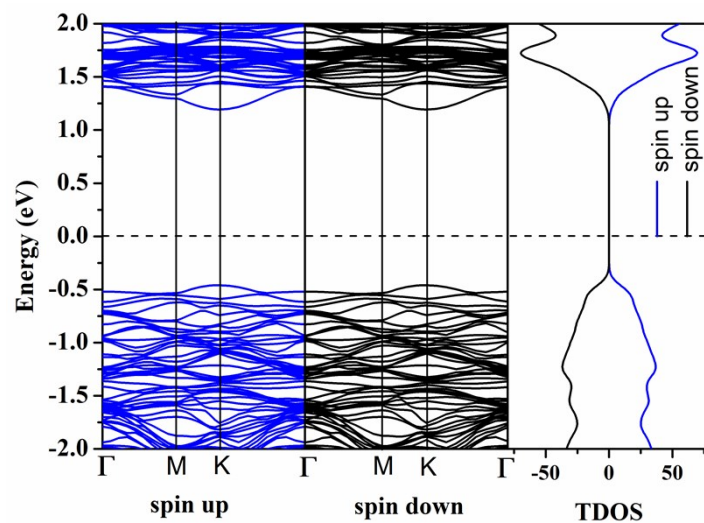

**Figure S3.** Top view (upper panel) and side view (lower panel) of optimized structure of O and S-O group adsorbed at Mo-50 edge, which is energetically unfavored by 1.25 eV related to the geometry of SO<sub>2</sub> molecule physisorbed at Mo-50 edge shown in Fig.4(b).

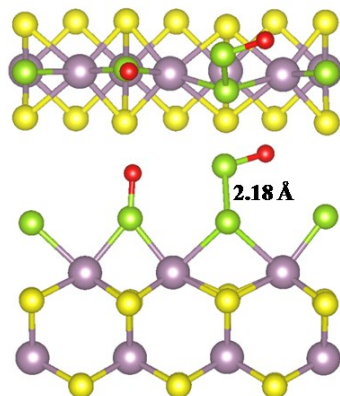

**Figure S4. (a)** Top view (upper panel) and side view (lower panel) of optimized structure of H-Mo-50 edge.

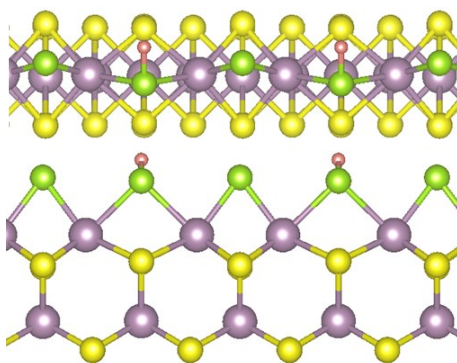

**Table S1.** Calculated formation energy ( $E_f$ ) of single S vacancy of pristine MoS<sub>2</sub> ML and edge S vacancy of Mo-50 edge. The formation energy is calculated as  $E_f = E_{SV} + V_S - E_0$ , where  $E_{SV}$ ,  $E_S$  and  $E_0$  are calculated total energies for MoS<sub>2</sub> with SV or Mo-50 edge with edge SV, isolated S atom and clean MoS<sub>2</sub> ML or Mo-50 edge, respectively.

|            | MoS <sub>2</sub> ML | Mo-50 edge |
|------------|---------------------|------------|
| $E_f$ (eV) | 6.65                | 5.01       |
